# Supplementary material for: Up-Regulation of Tumor Necrosis Factor Superfamily Genes in Early Phases of Photoreceptor Degeneration
Source: PLoS One. 2013 Dec 19;8(12):e85408. doi: 10.1371/journal.pone.0085408 (PMC3868615; doi:10.1371/journal.pone.0085408)
Supplement: Table S2 — Western blot quantification. ImageJ was used to quantify the signal intensities of bands found with western blot analysis for proteins that are retina-specific (RHO, SAG; Figure 3A) or involved in signaling pathways (TNFA, CD40LG, TNFSF8, TNFRSF1A, TNFRSF9, TRADD, CASP8, STAT3, NTF3, XIAP; Figure 5). Signal normalization was performed with either ACTB or GAPDH. (XLSX) [file pone.0085408.s004.xlsx]

## Sheet: WB quantification
Supplementary Table S2. Western blot quantification. ImageJ was used to quantify the signal intensities of bands found with western blot analysis for proteins that are retina-specific (RHO, SAG; Figure 3A)
or involved in signaling pathways (TNFA, CD40LG, TNFSF8, TNFRSF1A, TNFRSF9, TRADD, CASP8, STAT3, NTF3, XIAP; Figure 5). Signal normalization was performed with either ACTB or GAPDH.
protein	5 wks normal	5 wks rcd1	7 wks normal	7 wks rcd1	7 wks xlpra2	8.3 wks erd	16 wks normal	16 wks rcd1	16 wks xlpra2
RHO	23207.9	5294.99	58269.6	1456.15	51376.9	30071.4	56489.7	679.246	7510.7
ACTB	24722.9	25951.7	16832.3	22176.8	18118	19214.6	18677.6	22647.8	22931
normalized signal	0.938722	0.204032	3.46176	0.0656608	2.83569	1.56503	3.02446	0.0299917	0.327534
FC difference compared to normal	1	0.217351	1	0.0189675	0.819145	0.45209	1	0.00991639	0.108295
SAG	7256.19	6096.41	7626.82	4707.98	7779.21	8005.26	11484.9	8912.18	3007.62
ACTB	43182.3	47865	45283.3	42737.5	45434.8	41454.6	48494.7	50533.7	45959.9
normalized signal	0.168036	0.127367	0.168424	0.11016	0.171217	0.193109	0.236828	0.176361	0.0654402
FC difference compared to normal	1	0.757974	1	0.654064	1.01658	1.14656	1	0.744682	0.27632
TNFA	9437.68	12375.3	6922.18	15236.4	9836.39	10690.7	7474.83	14515.4	13786.7
ACTB	19574.2	21232.8	24196.5	26427.8	21028	22815.5	24157.5	18327.5	19803
normalized signal	0.482149	0.582841	0.286081	0.57653	0.467775	0.468572	0.309421	0.792002	0.696191
FC difference compared to normal	1	1.20884	1	2.01527	1.63511	1.6379	1	2.55962	2.24998
CD40LG	5917.54	10106.6	6377	11475.3	12609.4	11209.6	8127.94	18890.9	19814.9
ACTB	27851.2	26107.3	17715.2	16608.2	18359.8	19090.9	27755.6	31153.3	28301.6
normalized signal	0.21247	0.387116	0.359973	0.690941	0.686792	0.587168	0.29284	0.606384	0.700136
FC difference compared to normal	1	1.82198	1	1.91943	1.9079	1.63115	1	2.0707	2.39085
TNFSF8	2730.98	2411.79	9968.33	11712.1	23567.7	8747.89	7719.87	13044.4	9817.09
ACTB	20991.4	17698.9	22537.7	18731.9	23069	21088.9	21253.8	20833.8	23489.5
normalized signal	0.1301	0.136268	0.442297	0.625249	1.02162	0.414811	0.363224	0.626116	0.417935
FC difference compared to normal	1	1.04741	1	1.41364	2.30981	0.937857	1	1.72378	1.15063
TNFRSF1A	8648.73	11474.8	8446.49	12062.4	12102.9	11703.6	11532.5	14262.4	14551.6
GAPDH	20106.6	20521.2	20139.1	21569.4	21589.5	20653.7	21361.4	21581.4	20235.5
normalized signal	0.430143	0.559167	0.419408	0.55924	0.560591	0.566658	0.539876	0.660863	0.719114
FC difference compared to normal	1	1.29996	1	1.3334	1.33663	1.35109	1	1.2241	1.332
TNFRSF9 (37 kDa band)	12553.4	12135.2	1333.48	13241.9	18300.4	15555.5	3930.32	10638.6	10199.1
ACTB	21670.5	23062.5	18347.9	21089	20768.3	21922.3	18832.7	21210.7	21307.8
normalized signal	0.579283	0.52619	0.0726772	0.627905	0.881171	0.709573	0.208696	0.501565	0.478656
FC difference compared to normal	1	0.908347	1	8.63964	12.1244	9.76335	1	2.40332	2.29355
TNFRSF9 (32 kDa band)	10752.9	11438.2	321.263	12465.9	18576.7	15097.9	1372.01	7741.83	7223.83
ACTB	21670.5	23062.5	18347.9	21089	20768.3	21922.3	18832.7	21210.7	21307.8
normalized signal	0.4962	0.495966	0.0175095	0.591106	0.894477	0.688698	0.0728526	0.364996	0.339023
FC difference compared to normal	1	0.999529	1	33.7592	51.0853	39.3329	1	5.01006	4.65355
TRADD	1599.89	1101.48	164.719	5309.37	2454.1	2980.81	2198.5	6914.88	3960.03
ACTB	17581.5	14229.5	20477.2	21252.5	22007.1	20782.6	20314.8	22689.3	21463.7
normalized signal	0.0909988	0.0774082	0.00804402	0.249823	0.111514	0.143428	0.108222	0.304763	0.184499
FC difference compared to normal	1	0.850651	1	31.0569	13.863	17.8304	1	2.8161	1.70483
CASP8	2971.88	6779.9	937.062	11557.9	5633.66	5802.12	1047.82	3176.81	2456.74
ACTB	23024.8	23292.6	22968.5	22829.3	22415.4	21840.6	16815.6	19712.1	23725.8
normalized signal	0.129073	0.291075	0.0407977	0.506274	0.25133	0.265658	0.0623123	0.161161	0.103547
FC difference compared to normal	1	2.25512	1	12.4094	6.16039	6.51159	1	2.58634	1.66174
STAT3	6804.17	11997.7	11155.7	18255.2	17019	17296.7	7700.1	18933.8	20611.7
GAPDH	15972	12636.7	9149.9	9077.08	8519.83	9759.61	11603.9	9291.73	10137.9
normalized signal	0.426006	0.949438	1.21921	2.01113	1.99757	1.77228	0.663577	2.0377	2.03313
FC difference compared to normal	1	2.2287	1	1.64954	1.63842	1.45363	1	3.07079	3.06389
NTF3	2193.83	3291.97	752.134	7306.39	4822.95	2442.1	636.263	1029.62	7188.1
GAPDH	15972	12636.7	9149.9	9077.08	8519.83	9759.61	11603.9	9291.73	10137.9
normalized signal	0.137355	0.26051	0.0822013	0.804928	0.566085	0.250226	0.0548317	0.11081	0.70903
FC difference compared to normal	1	1.89662	1	9.79215	6.88657	3.04406	1	2.02092	12.931
XIAP	5265.32	5683.02	6785.73	1923.67	3389.98	5317.78	5858.07	3700.42	4653.66
GAPDH	9480.64	10326.8	7318.37	4859.47	5172.86	6342	6524.07	5996.4	6992.54
normalized signal	0.555376	0.550317	0.927219	0.39586	0.65534	0.838502	0.897917	0.617107	0.665518
FC difference compared to normal	1	0.990892	1	0.426933	0.70678	0.904319	1	0.687265	0.74118
